# Supplementary material for: Spectral and structural comparison between bright and dim green fluorescent proteins in Amphioxus
Source: PubMed Central journal article supplement (PMC4073121; doi:10.1038/srep05469), 2014-06-27

SUPPORTING INFORMATION ONLINE  
Scientific Reports

**Spectral and structural comparison between bright and dim green  
fluorescent proteins in *Amphioxus***

Erin K Bomati, Joy E Haley, Joseph P Noel and Dimitri D Deheyn

**Supplementary tables**

**Table S1.** Crystallographic statistics associated with characterization of bfloGFPa1 and bfloGFPc1 structures.

|                        | <b>Statistic</b>    | <b>Sub Category</b>                     | <b>bfloGFPa1</b>                          | <b>bfloGFPc1</b>                            |
|------------------------|---------------------|-----------------------------------------|-------------------------------------------|---------------------------------------------|
| <b>DATA COLLECTION</b> | Space group         |                                         | C 2 2 2(1)                                | C 2                                         |
|                        | Cell Dimensions     | a, b, c,<br>$\alpha, \beta, \gamma$ (°) | 59.25, 125.58, 106.47<br>90.0, 90.0, 90.0 | 158.76, 130.46, 106.33<br>90.0, 128.4, 90.0 |
|                        | Resolution (Å)*     |                                         | 50.0 - 1.35(1.4 - 1.35)                   | 50.0 - 1.95 (2.02 – 1.95)                   |
|                        | $R_{sym}$           |                                         | 4.7 (29.1)                                | 5.5 (51.3)                                  |
|                        | $I/\sigma$          |                                         | 37.9 (3.3)                                | 34.3 (2.7)                                  |
|                        | Completeness (%)    |                                         | 97.4 (83.9)                               | 99.7 (98.2)                                 |
|                        | Redundancy          |                                         | 6.7 (5.2)                                 | 5.3 (4.9)                                   |
| <b>REFINEMENT</b>      | Resolution (Å)      |                                         | 1.35                                      | 1.95                                        |
|                        | No. Reflections     |                                         | 87211                                     | 123290                                      |
|                        | $R_{work}/R_{free}$ |                                         | .2939/.3214                               | .2944/.3216                                 |
|                        | No. of atoms        | Protein                                 | 3357                                      | 13224                                       |
|                        |                     | Ligand                                  | 38                                        | 152                                         |
|                        |                     | Water                                   | 501                                       | 581                                         |
|                        | B-factor            | Protein                                 | 13.2                                      | 41.7                                        |
|                        |                     | Ligand                                  | 9.0                                       | 42.0                                        |
|                        |                     | Water                                   | 25.2                                      | 38.4                                        |
| R.m.s. deviations      | Bond angles (°)     |                                         |                                           |                                             |
|                        | Bond lengths (Å)    |                                         |                                           |                                             |

\* Number in parentheses refers to highest shell

**Table S2:** List of GFPs found with similar crystallographic resolution as bfpGFPa1, and their average B-factor values from the atoms comprising the chromophore (from PDB database and Lohman and Remington 2008).

| <b>PDB ID</b> | <b>B-factor</b> | <b>QE</b> |
|---------------|-----------------|-----------|
| 2DUG          | 21.1            | <100%     |
| 2C9J          | 21.0            | <100%     |
| 1XMZ          | 17.3            | <100%     |
| 2QT2          | 15.9            | <100%     |
| 2DUI          | 14.2            | <100%     |
| 2DUE          | 13.6            | <100%     |
| 2ZO6          | 12.6            | <100%     |
| 1Q4A          | 11.7            | <100%     |
| 1Q4E          | 11.0            | <100%     |
| 2B3P          | 10.3            | <100%     |
| 2GW3          | 10.2            | <100%     |
| 2HRS          | 10.0            | <100%     |
| 2O24          | 9.7             | <100%     |
| 3CD1          | 9.5             | <100%     |
| 3CB9          | 6.2             | <100%     |
| GFPa1         | 8.7             | =100%     |

### Supplementary Figures

**Figure S1.** Ribbon representation of the bflGFPa1 dimer. Monomer A is colored blue, monomer B is colored rose. The GYG-derived chromophore is shown in space filling model with the carbon atoms colored black.

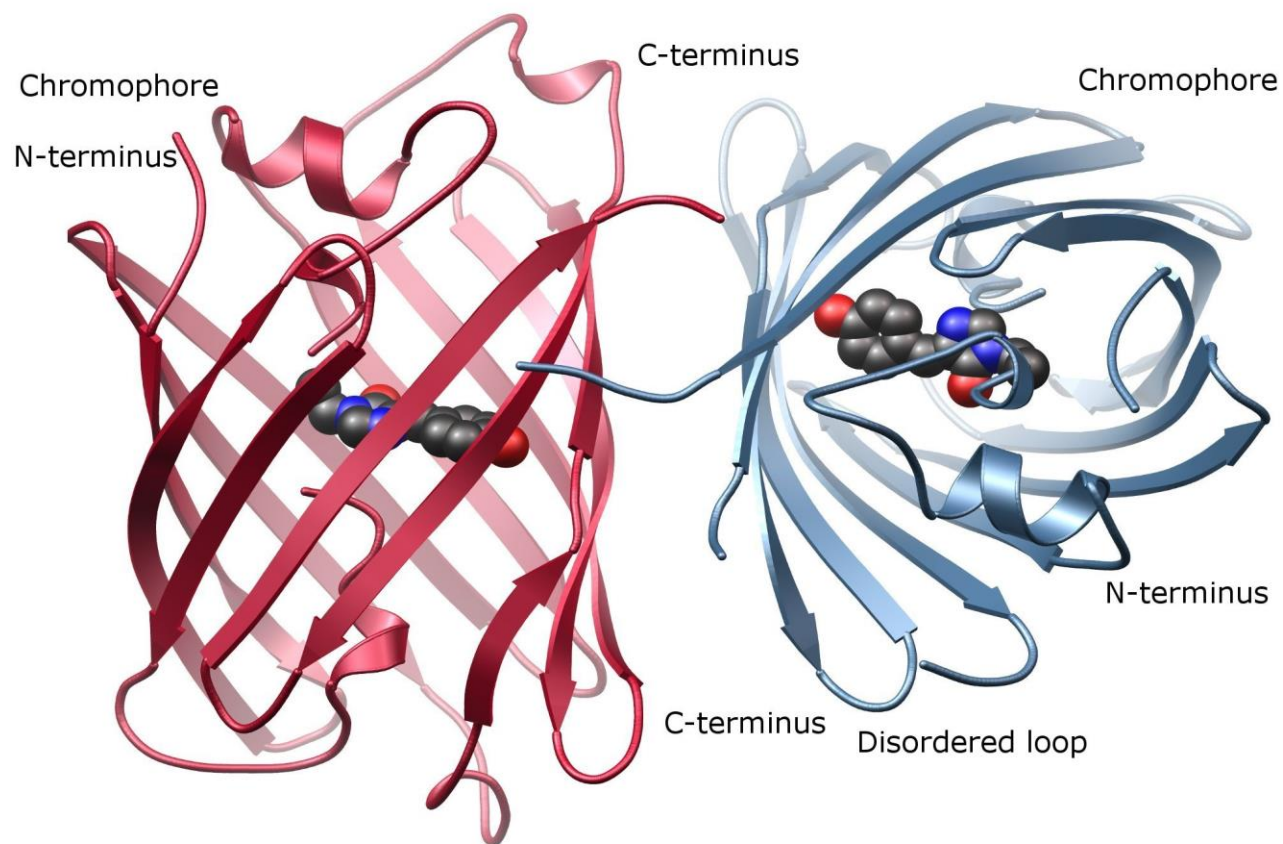

**Figure S2.** Overlay of structurally similar GFPs including bflGFPa1 in gold, bflGFPc1 in red, and copGFP (PDBid 2G3O) in blue. Chromophores are shown in ball-and-stick representation with carbon atoms color coordinated to match ribbon structure.

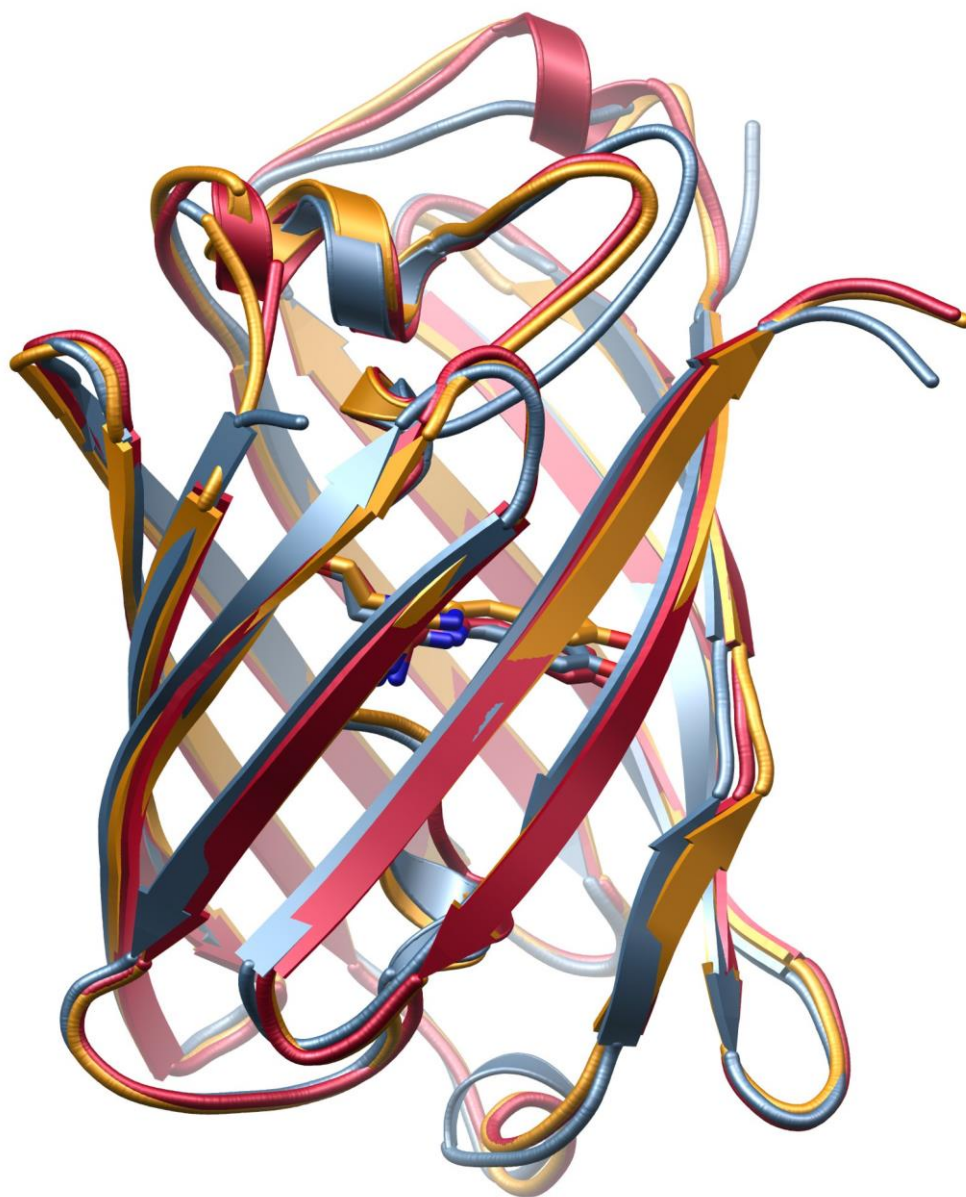

**Figure S3.** Overlay of bflGFPa1 and copGFP chromophore sites. Side chains and chromophores (CRO) are shown in ball-and-stick representation with carbon atoms colored gold (bflGFPa1) and blue (copGFP).

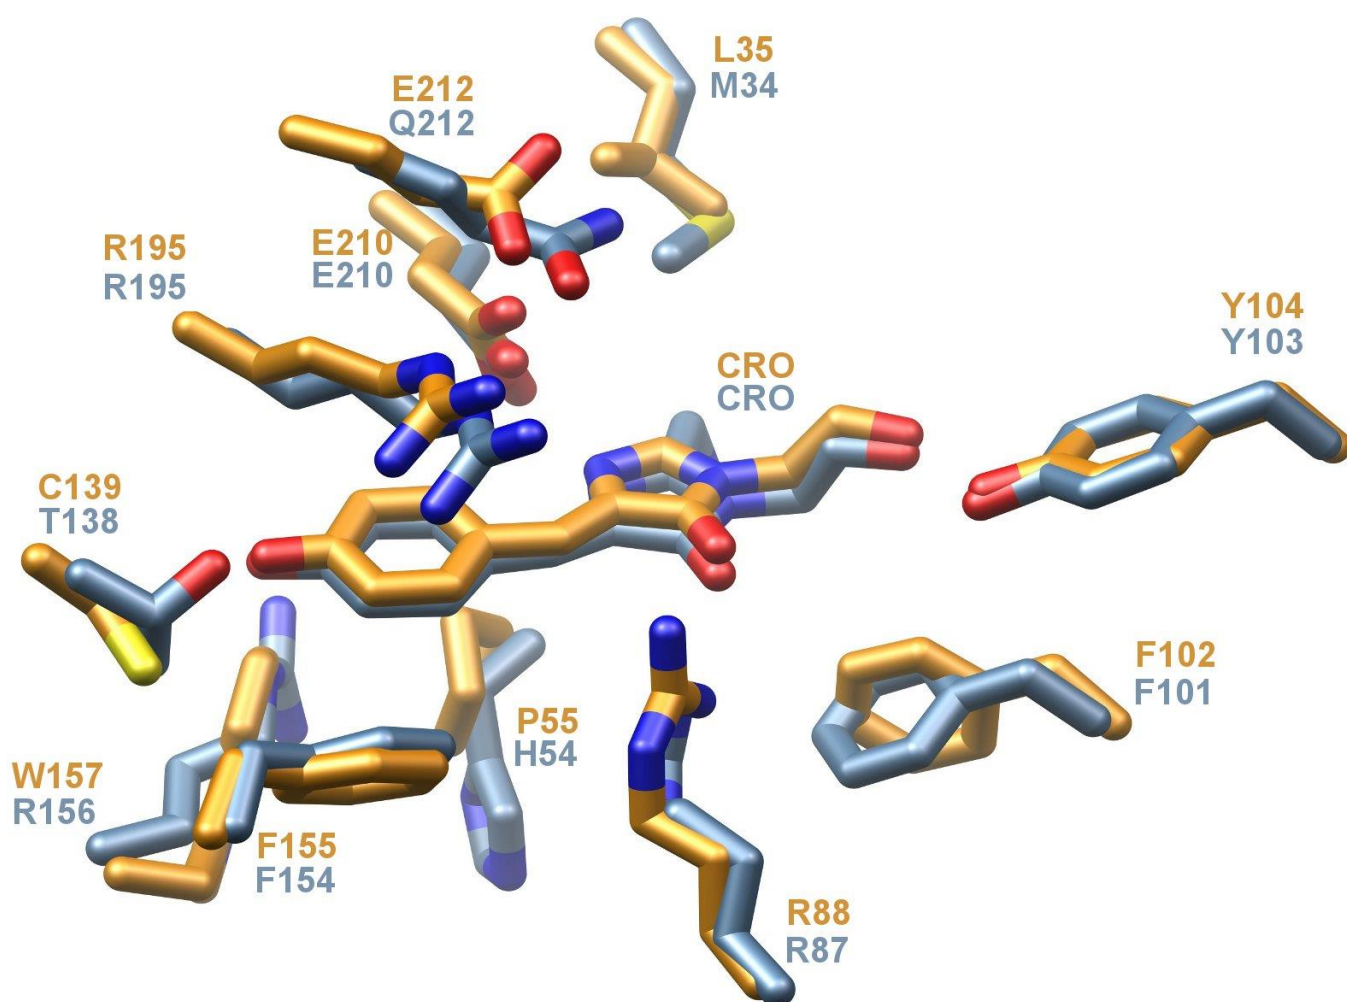

Supplement: srep05469-s1.pdf [file srep05469-s1.pdf]
